# Supplementary material
Source: publisher figshare collection journal article supplement (https://sage.figshare.com/ndownloader/files/15592589)
Supplement: Supplementary file 1 [file 15592589]

**Supplementary File 4: Table of Treatment and Outcomes**

|                                       | <b>Intervention</b>                                                                                                                                                                                                                                                                                                                                             | <b>Length of treatment</b> | <b>Treatment Fidelity/<br/>manualised?</b>                                       | <b>Home practice</b>                         | <b>Main Mental Health Outcomes</b>                                                                                                                                                                                                                                                                         | <b>Main Physical Health Outcomes</b>                                                                                                                                                                                                                                                        |
|---------------------------------------|-----------------------------------------------------------------------------------------------------------------------------------------------------------------------------------------------------------------------------------------------------------------------------------------------------------------------------------------------------------------|----------------------------|----------------------------------------------------------------------------------|----------------------------------------------|------------------------------------------------------------------------------------------------------------------------------------------------------------------------------------------------------------------------------------------------------------------------------------------------------------|---------------------------------------------------------------------------------------------------------------------------------------------------------------------------------------------------------------------------------------------------------------------------------------------|
| Bussone et al. (1988)                 | <p>1. Biofeedback and progressive muscle relaxation involving:</p> <ul style="list-style-type: none"> <li>- Progressive muscle relaxation training</li> <li>- EMG Biofeedback: baseline, auditory feedback and self-control (feedback signal turned off, while subject was instructed to continue attempting to relax).</li> </ul> <p>2. Relaxation placebo</p> | 7 hours                    | Manualised: Yes<br>Treatment Fidelity independently rated: NR<br>Supervision: NR | No home practice                             | <p>Significantly greater reductions in the biofeedback group compared to the control group from pre-treatment to follow-up (post treatment, 3,6, and 12 month) in</p> <ul style="list-style-type: none"> <li>• trait anxiety**</li> </ul> <p>No significant difference between groups on state anxiety</p> | <p>Significantly greater reductions in the biofeedback group compared to the control group from baseline to follow-up (post treatment, 3,6, and 12 month) in</p> <ul style="list-style-type: none"> <li>• pain total index</li> <li>• EMG ratings (reduction of muscle tension).</li> </ul> |
| Chalder, Deary, Husain & Walwyn, 2010 | <p>1. Family focussed CBT:</p> <ul style="list-style-type: none"> <li>- activity pacing</li> <li>- sleep routine</li> </ul>                                                                                                                                                                                                                                     | 13 hours                   | Manualised: Yes<br>Fidelity independently rated: No                              | Families given treatment manual and homework | Significantly greater reductions in the FFCBT group compared to the                                                                                                                                                                                                                                        | There were no significant differences between groups on post-                                                                                                                                                                                                                               |

|                                              |                                                                                                                                                                                                                                                                                                                                                  |                 |                                                                                                                                     |            |                                                                                                                                                                                                                                                                                                                                                                               |                                                                                                                                                                                                                                                           |
|----------------------------------------------|--------------------------------------------------------------------------------------------------------------------------------------------------------------------------------------------------------------------------------------------------------------------------------------------------------------------------------------------------|-----------------|-------------------------------------------------------------------------------------------------------------------------------------|------------|-------------------------------------------------------------------------------------------------------------------------------------------------------------------------------------------------------------------------------------------------------------------------------------------------------------------------------------------------------------------------------|-----------------------------------------------------------------------------------------------------------------------------------------------------------------------------------------------------------------------------------------------------------|
| <p><b>*2012 Follow up study included</b></p> | <ul style="list-style-type: none"> <li>- cognitive re-structuring</li> <li>- encouraging family members to communicate about the illness</li> <li>- relapse prevention.</li> </ul> <p>2. Psycho-ed: dyadic teaching about CFS</p> <ul style="list-style-type: none"> <li>- pre-disposing and maintaining factors (symptom management)</li> </ul> |                 | <p>Treatment Fidelity monitored through supervision: Yes</p>                                                                        |            | <p>control group from pre-treatment to 24 month follow-up on</p> <ul style="list-style-type: none"> <li>• emotional</li> <li>• behavioural and</li> <li>• relationship difficulties</li> </ul> <p>No significant differences between groups from post-treatment to follow-up (6 and 12 month) on depression scores. Depression scores not reported at 24 month follow-up.</p> | <p>treatment, 6, 12 or 24 month follow-up school attendance or fatigue scores.</p>                                                                                                                                                                        |
| <p>Crawley et al. (2017)</p>                 | <p>1. Lightning Process (LP) plus Specialist Medical Care<br/>The Lightning Process consisted of</p> <ul style="list-style-type: none"> <li>• Small group sessions</li> <li>• Psychoeducation about stress response, mind-body interaction and unhelpful thought processes.</li> </ul>                                                           | <p>12 hours</p> | <p>Manualised: Yes<br/>Treatment Fidelity independently monitored: NR<br/>Treatment Fidelity monitored through supervision : NR</p> | <p>Yes</p> | <p>Significantly greater reductions in LP+SMC group compared with control group (SMC alone) from pre-treatment to 6 and 12 month follow-up in</p> <ul style="list-style-type: none"> <li>• anxiety scores on SCAS</li> <li>• anxiety scores on HADS</li> </ul>                                                                                                                | <p>Significantly greater improvements in LP+SMC group compared with control group (SMC alone) from pre-treatment to 6 and 12 month follow-up in</p> <ul style="list-style-type: none"> <li>• physical function</li> <li>• fatigue score on CFS</li> </ul> |

|                         |                                                                                                                                                                                                                                                                                                                                                                                                                                                                                                       |          |                                       |  |                                                                                                                                                                                                                                                          |                                                                                                                                                                                                                                                |
|-------------------------|-------------------------------------------------------------------------------------------------------------------------------------------------------------------------------------------------------------------------------------------------------------------------------------------------------------------------------------------------------------------------------------------------------------------------------------------------------------------------------------------------------|----------|---------------------------------------|--|----------------------------------------------------------------------------------------------------------------------------------------------------------------------------------------------------------------------------------------------------------|------------------------------------------------------------------------------------------------------------------------------------------------------------------------------------------------------------------------------------------------|
|                         | <ul style="list-style-type: none"> <li>• Group discussion about the use of language.</li> <li>• Goals identification</li> <li>• Cognitive strategies</li> </ul> <p>The SMC was:</p> <ul style="list-style-type: none"> <li>• conducted various healthcare professionals including doctors, physiotherapists and occupational therapists.</li> <li>• Participants were seen by the different health care providers based on individual goals.</li> </ul> <p>2. Specialist Medical Care (SMC) alone</p> |          |                                       |  | <p>Significantly greater reductions in LP+SMC group compared with control group (SMC alone) from pre-treatment to 12 month follow-up, but not at 6 month follow-up, in</p> <ul style="list-style-type: none"> <li>• depression scores on HADS</li> </ul> | <p>Significantly greater increase in LP+SMC group compared with control group (SMC alone) from pre-treatment to 12 month follow-up, but not at 6 month follow-up, in</p> <ul style="list-style-type: none"> <li>• school attendance</li> </ul> |
| Griffiths et al. (1996) | <p>1. Clinic, group based</p> <p>2. Home, individual</p>                                                                                                                                                                                                                                                                                                                                                                                                                                              | 12 hours | Manualised: Yes<br>Treatment Fidelity |  | Between groups differences were not reported.                                                                                                                                                                                                            | There was a significantly greater reduction in                                                                                                                                                                                                 |

|  |                                                                                                                                                                                                                                                                                                                                                                                                                                                      |  |                                                    |  |                                                                                                                                                                                                                                                                                                                                                                                                                                                                                                                                                                                                                         |                                                                                                                                                                                                                                                                                                                                                                                                                                                                                                                        |
|--|------------------------------------------------------------------------------------------------------------------------------------------------------------------------------------------------------------------------------------------------------------------------------------------------------------------------------------------------------------------------------------------------------------------------------------------------------|--|----------------------------------------------------|--|-------------------------------------------------------------------------------------------------------------------------------------------------------------------------------------------------------------------------------------------------------------------------------------------------------------------------------------------------------------------------------------------------------------------------------------------------------------------------------------------------------------------------------------------------------------------------------------------------------------------------|------------------------------------------------------------------------------------------------------------------------------------------------------------------------------------------------------------------------------------------------------------------------------------------------------------------------------------------------------------------------------------------------------------------------------------------------------------------------------------------------------------------------|
|  | <p>Protocol for both groups:</p> <ul style="list-style-type: none"> <li>• Education</li> <li>• progressive relaxation and breathing exercises</li> <li>• Cognitive skills I (monitoring positive and negative self-statements about headaches)</li> <li>• Cognitive skills II (generating positive self-statements to replace negative self-statements about exercises headaches)</li> <li>• Mental imagery</li> <li>• relapse management</li> </ul> |  | <p>independently rated: NR<br/>Supervision: NR</p> |  | <p>Statistically significant within groups improvements from baseline to post-treatment for</p> <ul style="list-style-type: none"> <li>• coping skills for the home and clinic treatment groups but not the control group</li> </ul> <p>Statistically significant within groups improvements from baseline to post-treatment for</p> <ul style="list-style-type: none"> <li>• anxiety for the clinic group, but not the home or the control groups</li> </ul> <p>Non-significant reduction in depression scores for the clinic group, but not the home or the control groups</p> <p>Psychological measures were not</p> | <ul style="list-style-type: none"> <li>• headache scores for groups 1 and 2 compared with group 3 from pre- to post-treatment.</li> </ul> <p>There were no significant differences between groups 1 and 2 on headache index scores.</p> <p>Non-significant within groups reduction for groups 1 and 2 but not the control group from baseline to post-treatment in</p> <ul style="list-style-type: none"> <li>• medication usage</li> </ul> <p>Between groups differences were not reported at follow-up (9weeks).</p> |
|--|------------------------------------------------------------------------------------------------------------------------------------------------------------------------------------------------------------------------------------------------------------------------------------------------------------------------------------------------------------------------------------------------------------------------------------------------------|--|----------------------------------------------------|--|-------------------------------------------------------------------------------------------------------------------------------------------------------------------------------------------------------------------------------------------------------------------------------------------------------------------------------------------------------------------------------------------------------------------------------------------------------------------------------------------------------------------------------------------------------------------------------------------------------------------------|------------------------------------------------------------------------------------------------------------------------------------------------------------------------------------------------------------------------------------------------------------------------------------------------------------------------------------------------------------------------------------------------------------------------------------------------------------------------------------------------------------------------|

|                             |                                                                                                                                                                                                                                                                                                                      |         |                                                                                                                            |                                                                                              |                                                                                                                                                                                                                                                                                                                                                        |                                                                                                                                                                                                                                                         |
|-----------------------------|----------------------------------------------------------------------------------------------------------------------------------------------------------------------------------------------------------------------------------------------------------------------------------------------------------------------|---------|----------------------------------------------------------------------------------------------------------------------------|----------------------------------------------------------------------------------------------|--------------------------------------------------------------------------------------------------------------------------------------------------------------------------------------------------------------------------------------------------------------------------------------------------------------------------------------------------------|---------------------------------------------------------------------------------------------------------------------------------------------------------------------------------------------------------------------------------------------------------|
|                             |                                                                                                                                                                                                                                                                                                                      |         |                                                                                                                            |                                                                                              | collected at follow-up (9weeks).                                                                                                                                                                                                                                                                                                                       |                                                                                                                                                                                                                                                         |
| Hickman et al. 2015         | <p>1.COPE-HEP:</p> <ul style="list-style-type: none"> <li>Thinking, feeling, behaving headache triggers</li> <li>Self-esteem</li> <li>Stress and coping</li> <li>Problem solving</li> </ul> <p>Headache education</p> <ul style="list-style-type: none"> <li>Headache triggers</li> </ul> <p>Headache management</p> | 3 hours | Manualised:Yes<br>Treatment Fidelity independently rated: No<br>Treatment Fidelity monitored through supervision: Yes      |                                                                                              | <p>There were significant improvements in both groups from pre- to post- intervention in</p> <ul style="list-style-type: none"> <li>anxiety scores****</li> <li>depression scores</li> <li>copng beliefs</li> </ul> <p>Perceived stress scores were not significantly reduced in either group.</p> <p>No between groups differences were observed.</p> | <p>There was a significant reduction in headache disability for both groups***</p> <p>No group differences were observed.</p>                                                                                                                           |
| Kashikar-Zuck et al. (2005) | <p>CBT (CST)</p> <ul style="list-style-type: none"> <li>muscle relaxation techniques</li> <li>activity pacing</li> <li>cognitive techniques (negative thoughts/ mood difficulties)</li> <li>problem-solving</li> <li>sleep hygiene</li> </ul>                                                                        | 6 hours | Manualised:Yes<br>Treatment Fidelity independently monitored: No<br>Treatment Fidelity monitored through supervision : Yes | Home practice was assigned for each of these techniques at the end of each training session. | <p>Significant within subjects improvement in both groups from pre-to post-treatment for</p> <ul style="list-style-type: none"> <li>depressive symptoms</li> </ul> <p>There were no significant differences between groups.</p>                                                                                                                        | <p>Significantly greater reduction in the CST compared with the SM group from pre- to post-treatment in</p> <ul style="list-style-type: none"> <li>pain levels</li> </ul> <p>Significant within groups differences from pre-to post-intervention in</p> |

|                                                                  |                                                                                                                                                                                               |                    |                                                                                                    |                                                    |                                                                                                                                                                                                                               |                                                                                                                                                                                                                                                                                                                                                                                                                                                          |
|------------------------------------------------------------------|-----------------------------------------------------------------------------------------------------------------------------------------------------------------------------------------------|--------------------|----------------------------------------------------------------------------------------------------|----------------------------------------------------|-------------------------------------------------------------------------------------------------------------------------------------------------------------------------------------------------------------------------------|----------------------------------------------------------------------------------------------------------------------------------------------------------------------------------------------------------------------------------------------------------------------------------------------------------------------------------------------------------------------------------------------------------------------------------------------------------|
|                                                                  | <ul style="list-style-type: none"> <li>• Parent training in behavioural management techniques (changing response to illness)</li> </ul> <p>2. SM<br/>Self-monitoring headaches with diary</p> |                    |                                                                                                    |                                                    | <p>Non-significant greater reduction in the SM to CST group compared to the CST to SM group in</p> <ul style="list-style-type: none"> <li>• depressive symptoms from pre-treatment to follow-up (after cross-over)</li> </ul> | <ul style="list-style-type: none"> <li>• pain-coping efficacy</li> </ul> <p>No significant change in</p> <ul style="list-style-type: none"> <li>• tender point or</li> <li>• pressure-pain threshold.</li> </ul> <p>Non-significant greater reduction in the SM to CST group compared to the CST to SM group in</p> <ul style="list-style-type: none"> <li>• overall functional disability from pre-treatment to follow-up (after cross-over)</li> </ul> |
| Kashikar-Zuck, Ting, Arnold, Bean, Powers, Graham, et al. (2012) | <p>1.CBT</p> <ul style="list-style-type: none"> <li>• muscle relaxation techniques</li> <li>• activity pacing</li> <li>• cognitive techniques (negative</li> </ul>                            | 7 hours 30 minutes | Manualised: Yes<br>Treatment Fidelity independently monitored: Yes<br>Treatment Fidelity monitored | H/w for both groups on content of previous session | <p>Significantly greater reduction in the CBT group compared with the FME group from pre- to post-treatment in</p> <ul style="list-style-type: none"> <li>• depression scores.</li> </ul>                                     | <p>Significantly greater reduction in the CBT group compared with the FME group from pre- to post-treatment in</p> <ul style="list-style-type: none"> <li>• Functional disability</li> </ul>                                                                                                                                                                                                                                                             |

|                   |                                                                                                                                                                                                                                                                                                                                                                                                       |                                                                                             |                                                                                                                                           |     |                                                                                                                                                                                                                                                                                                               |                                                                                                                                                                                                                                                          |
|-------------------|-------------------------------------------------------------------------------------------------------------------------------------------------------------------------------------------------------------------------------------------------------------------------------------------------------------------------------------------------------------------------------------------------------|---------------------------------------------------------------------------------------------|-------------------------------------------------------------------------------------------------------------------------------------------|-----|---------------------------------------------------------------------------------------------------------------------------------------------------------------------------------------------------------------------------------------------------------------------------------------------------------------|----------------------------------------------------------------------------------------------------------------------------------------------------------------------------------------------------------------------------------------------------------|
|                   | <p>thoughts/ mood difficulties)</p> <ul style="list-style-type: none"> <li>• problem-solving</li> <li>• sleep hygiene</li> <li>• Parent training in behavioural management techniques (changing response to illness)</li> </ul> <p>2. FM Education</p> <ul style="list-style-type: none"> <li>• Information about medication</li> </ul> <p>Discussion of lifestyle issues (diet, sleep, exercise)</p> |                                                                                             | through supervision : NR                                                                                                                  |     | <p>Treatment gains, were maintained at follow-up, however the between groups difference did not reach significance at 6 month follow-up.</p>                                                                                                                                                                  | <p>Treatment gains were maintained at 6 month follow-up.</p> <p>Significant within groups reduction from baseline to follow-up in</p> <ul style="list-style-type: none"> <li>• pain severity</li> </ul> <p>No significant between group differences.</p> |
| Law et al. (2015) | <p>1. Internet WEB-MAP programme plus Specialist Headache Treatment (SHT). For the Internet WEB-MAP programme, adolescents completed online modules on</p> <ul style="list-style-type: none"> <li>• pain education</li> <li>• goal setting</li> <li>• relaxation training</li> <li>• distraction strategies</li> </ul>                                                                                | 9 hours per family (4 hours for adolescents, 4 hours for parents, 1 hour online coach time) | <p>Manualised: Yes</p> <p>Treatment Fidelity independently monitored: NR</p> <p>Treatment Fidelity monitored through supervision: Yes</p> | Yes | <p>No significant between group differences from pre to post-treatment or at 3 month follow-up for</p> <ul style="list-style-type: none"> <li>• depression</li> <li>• anxiety</li> </ul> <p>Significant within groups improvement from pre- to post-treatment and at 3 month follow-up for both groups in</p> | <p>No significant between group differences from pre to post-treatment or at 3 month follow-up on</p> <ul style="list-style-type: none"> <li>• headache frequency</li> <li>• headache intensity</li> <li>• activity limitation</li> </ul>                |

|  |                                                                                                                                                                                                                                                                                                                                                                                                                                                                                                                                                                                                                                                                                  |  |  |  |                                                                |                                                                                                                                                                                                  |
|--|----------------------------------------------------------------------------------------------------------------------------------------------------------------------------------------------------------------------------------------------------------------------------------------------------------------------------------------------------------------------------------------------------------------------------------------------------------------------------------------------------------------------------------------------------------------------------------------------------------------------------------------------------------------------------------|--|--|--|----------------------------------------------------------------|--------------------------------------------------------------------------------------------------------------------------------------------------------------------------------------------------|
|  | <ul style="list-style-type: none"> <li>• cognitive strategies</li> <li>• sleep and lifestyle</li> <li>• relapse prevention</li> </ul> <p>Adolescents also had limited time with an online coach.</p> <p>Parents completed modules</p> <ul style="list-style-type: none"> <li>• pain education</li> <li>• goal setting</li> <li>• operant training communication strategies</li> <li>• modelling</li> <li>• cognitive strategies</li> <li>• sleep and lifestyle</li> <li>• relapse prevention</li> </ul> <p>For the Specialist Headache Treatment, participants received one or more of the following interventions as recommended by their providers at the headache clinic:</p> |  |  |  | <ul style="list-style-type: none"> <li>• depression</li> </ul> | <p>Significant within groups improvement from pre- to post-treatment for both groups in</p> <ul style="list-style-type: none"> <li>• headache frequency</li> <li>• headache intensity</li> </ul> |
|--|----------------------------------------------------------------------------------------------------------------------------------------------------------------------------------------------------------------------------------------------------------------------------------------------------------------------------------------------------------------------------------------------------------------------------------------------------------------------------------------------------------------------------------------------------------------------------------------------------------------------------------------------------------------------------------|--|--|--|----------------------------------------------------------------|--------------------------------------------------------------------------------------------------------------------------------------------------------------------------------------------------|



|                   |                                                                                                                                                                                                                                                                                                                                                                                                                   |         |                                                                                                                           |  |                                                                                                                                                                                                                                                                                                                                                                                       |                                                                                                                                                                                                                                                                                                                                                               |
|-------------------|-------------------------------------------------------------------------------------------------------------------------------------------------------------------------------------------------------------------------------------------------------------------------------------------------------------------------------------------------------------------------------------------------------------------|---------|---------------------------------------------------------------------------------------------------------------------------|--|---------------------------------------------------------------------------------------------------------------------------------------------------------------------------------------------------------------------------------------------------------------------------------------------------------------------------------------------------------------------------------------|---------------------------------------------------------------------------------------------------------------------------------------------------------------------------------------------------------------------------------------------------------------------------------------------------------------------------------------------------------------|
|                   | <ul style="list-style-type: none"> <li>• medication management</li> <li>• psychological therapy (face-to-face cognitive behavioural therapy for pain management and/or biofeedback)</li> <li>• physical therapy</li> </ul> <p>2. Specialist Headache Treatment alone</p>                                                                                                                                          |         |                                                                                                                           |  |                                                                                                                                                                                                                                                                                                                                                                                       |                                                                                                                                                                                                                                                                                                                                                               |
| Levy et al (2010) | <p>1.SLCBT:</p> <ul style="list-style-type: none"> <li>• relaxation training</li> <li>• modification of family responses to illness and wellness behaviours</li> <li>• cognitive restructuring</li> </ul> <p>2.Education (ES):</p> <ul style="list-style-type: none"> <li>• education about GI system anatomy and function</li> <li>• nutrition guidelines</li> </ul> <p>additional food-related information.</p> | 4 hours | Manualised:Yes<br>Treatment Fidelity independently monitored: Yes<br>Treatment Fidelity monitored through supervision: NR |  | <p>Significantly greater improvement in the SLCBT group, compared with the ES group in</p> <ul style="list-style-type: none"> <li>• parent report depression scores</li> <li>• child report catastrophising (anxiety measure)</li> </ul> <p>Treatment gains were maintained at follow-up, however the between groups difference was not significant at 3 and 6 month follow-up as</p> | <p>Significantly greater reduction in the SLCBT group, compared with the ES group in</p> <ul style="list-style-type: none"> <li>• parent report pain</li> </ul> <p>from pre-treatment to follow-up (time points: post-treatment, 3 and 6 months)</p> <p>Significantly greater improvement in the SLCBT group, compared with the ES group in parent report</p> |

|                       |                                                            |         |                                       |                                |                                                                                                                                                                                                                                                                                                                                                                                                                                                                                                                                                             |                                                                                                                                                                                                                                                              |
|-----------------------|------------------------------------------------------------|---------|---------------------------------------|--------------------------------|-------------------------------------------------------------------------------------------------------------------------------------------------------------------------------------------------------------------------------------------------------------------------------------------------------------------------------------------------------------------------------------------------------------------------------------------------------------------------------------------------------------------------------------------------------------|--------------------------------------------------------------------------------------------------------------------------------------------------------------------------------------------------------------------------------------------------------------|
|                       |                                                            |         |                                       |                                | <p>the ES group had also improved.</p> <p>Significantly greater improvement in the SLCBT group, compared with the ES group in parent report</p> <ul style="list-style-type: none"> <li>• Parental solicitousness (protectiveness in relation to pain)</li> <li>• Perceived pain threat</li> <li>• Problem focussed coping</li> <li>• Emotion focussed coping</li> </ul> <p>And child report</p> <ul style="list-style-type: none"> <li>• Pain coping skills</li> </ul> <p>from pre-treatment to follow-up (time points: post-treatment, 3 and 6 months)</p> | <ul style="list-style-type: none"> <li>• parent and child report symptom severity</li> <li>• parent report child functional disability</li> </ul> <p>from pre-treatment to post-treatment, but not for follow-ups, where the ES group had also improved.</p> |
| McGrath et al. (1992) | 1. Self-Administered (SA) at home<br>2. Clinic based (CB): | 8 hours | Manualised: Yes<br>Treatment Fidelity | Yes for both groups (not ctrl) | No between group differences were observed.                                                                                                                                                                                                                                                                                                                                                                                                                                                                                                                 | Significantly greater reduction for the SA group compared with the CB and                                                                                                                                                                                    |

|                       |                                                                                                                                                                                                                                                                                                                                                                                                                                |         |                                                                                             |                                  |                                                                                                                                                                                                                                                                             |                                                                                                                                                                                                                                                                                                                                                                                                                   |
|-----------------------|--------------------------------------------------------------------------------------------------------------------------------------------------------------------------------------------------------------------------------------------------------------------------------------------------------------------------------------------------------------------------------------------------------------------------------|---------|---------------------------------------------------------------------------------------------|----------------------------------|-----------------------------------------------------------------------------------------------------------------------------------------------------------------------------------------------------------------------------------------------------------------------------|-------------------------------------------------------------------------------------------------------------------------------------------------------------------------------------------------------------------------------------------------------------------------------------------------------------------------------------------------------------------------------------------------------------------|
|                       | <p>Protocol for both groups:</p> <ul style="list-style-type: none"> <li>• Relaxation exercises</li> <li>• Cognitive restructuring</li> <li>• Distraction and coping strategies</li> <li>• Problem-solving</li> </ul> <p>3.Control:</p> <ul style="list-style-type: none"> <li>• Provided with list of common triggers for headache, asked to avoid</li> </ul> <p>Taught a brainstorming technique for stressful situations</p> |         | <p>independently rated: NR</p> <p>Treatment Fidelity monitored through supervision : NR</p> |                                  | <p>A significant reduction in</p> <ul style="list-style-type: none"> <li>• depression scores</li> </ul> <p>from pre- to post-treatment for all 3 groups.</p> <p>*Treatment gains were maintained for the clinic and self-administer groups at 3 and 12 month follow-up.</p> | <p>control groups from pre- to post-treatment in</p> <ul style="list-style-type: none"> <li>• headache index scores</li> </ul> <p>Significant within groups improvements from pre- to post-treatment in</p> <ul style="list-style-type: none"> <li>• headache index scores</li> </ul> <p>for clinic and self-administer groups but not the control group.</p> <p>Treatment gains were maintained at follow-up</p> |
| Palermo et al. (2009) | <p>1.Online Family SLCBT:</p> <p>Children:</p> <ul style="list-style-type: none"> <li>• psycho-education</li> <li>• cognitive restructuring</li> <li>• relaxation techniques</li> </ul> <p>Parents:</p> <ul style="list-style-type: none"> <li>• psychoeducation</li> </ul>                                                                                                                                                    | 9 hours | <p>Manualised: Yes</p> <p>Treatment Fidelity independently rated: NA (online modules)</p>   | Yes (assignments between logins) | <p>No significant within group or between group differences on pre- to post-treatment</p> <ul style="list-style-type: none"> <li>• depression scores.</li> </ul> <p>*A significant within groups reduction in the treatment group in</p>                                    | <p>Significantly greater reduction in the SLCBT group compared with the control group in</p> <ul style="list-style-type: none"> <li>• activity limitations</li> <li>• pain intensity</li> </ul> <p>*Within groups treatment gains in</p>                                                                                                                                                                          |

|                       |                                                                                                                                                                                                                                                                                                                                                                                                                                                                               |                                                                                     |                                                                                                                            |     |                                                                                                                                                                                                                                                                                                                                                                                                                              |                                                                                                                                                                                                                                                                                                                                                                         |
|-----------------------|-------------------------------------------------------------------------------------------------------------------------------------------------------------------------------------------------------------------------------------------------------------------------------------------------------------------------------------------------------------------------------------------------------------------------------------------------------------------------------|-------------------------------------------------------------------------------------|----------------------------------------------------------------------------------------------------------------------------|-----|------------------------------------------------------------------------------------------------------------------------------------------------------------------------------------------------------------------------------------------------------------------------------------------------------------------------------------------------------------------------------------------------------------------------------|-------------------------------------------------------------------------------------------------------------------------------------------------------------------------------------------------------------------------------------------------------------------------------------------------------------------------------------------------------------------------|
|                       | <ul style="list-style-type: none"> <li>• operant skills training (response to illness)</li> <li>• communication</li> <li>• modelling</li> </ul> <p>2. Wait list control group</p>                                                                                                                                                                                                                                                                                             |                                                                                     |                                                                                                                            |     | <ul style="list-style-type: none"> <li>• depressive symptoms at 3 month follow-up (control group not followed up).</li> </ul>                                                                                                                                                                                                                                                                                                | these domains were maintained for the SLCBT group at follow-up (control group not followed up).                                                                                                                                                                                                                                                                         |
| Palermo et al. (2016) | <p>1. Internet delivered CBT (WEB-MAP)</p> <ul style="list-style-type: none"> <li>• Pain education</li> <li>• training in behavioural and cognitive coping skills</li> <li>• activity scheduling</li> <li>• education about pain behaviours</li> <li>• parental operant and communication strategies</li> <li>• Limited access to an online coach</li> </ul> <p>2. Internet delivered Education</p> <ul style="list-style-type: none"> <li>• Pain psycho-education</li> </ul> | 9 hours per family (4 hours - adolescent, 4 hours - parent and 1 hour - coach time) | Manualised: Yes<br>Treatment Fidelity independently monitored: NR<br>Treatment Fidelity monitored through supervision: Yes | Yes | <p>Significantly greater reductions in Internet CBT group compared with control group from pre- to post-treatment, but not at 6 month follow up in</p> <ul style="list-style-type: none"> <li>• Depression subscale (BAPQ)</li> <li>• Pain-related Anxiety subscale (BAPQ)</li> </ul> <p>No significant between group differences on</p> <ul style="list-style-type: none"> <li>• General anxiety subscale (BAPQ)</li> </ul> | <p>Significantly greater improvements in Internet CBT group compared with control group from pre-treatment to 6 follow-up in</p> <ul style="list-style-type: none"> <li>• Activity limitations</li> </ul> <p>No significant between group differences from pre-treatment to 6 month follow-up on</p> <ul style="list-style-type: none"> <li>• pain intensity</li> </ul> |

|                       |                                                                                                                                                                                                                                                                                                                                                                                                                                                                                                                                |                                                |                                                                                                                        |                   |                                                                                                                                                                                          |                                                                                                                                                                                                                                                                                       |
|-----------------------|--------------------------------------------------------------------------------------------------------------------------------------------------------------------------------------------------------------------------------------------------------------------------------------------------------------------------------------------------------------------------------------------------------------------------------------------------------------------------------------------------------------------------------|------------------------------------------------|------------------------------------------------------------------------------------------------------------------------|-------------------|------------------------------------------------------------------------------------------------------------------------------------------------------------------------------------------|---------------------------------------------------------------------------------------------------------------------------------------------------------------------------------------------------------------------------------------------------------------------------------------|
|                       | Diaries and assessments                                                                                                                                                                                                                                                                                                                                                                                                                                                                                                        |                                                |                                                                                                                        |                   |                                                                                                                                                                                          |                                                                                                                                                                                                                                                                                       |
| Scharff et al. (2002) | <p>1.Hand-warming group:</p> <ul style="list-style-type: none"> <li>• Thermal biofeedback training</li> <li>• Progressive muscle relaxation</li> <li>• Imagery</li> <li>• Vasodilation</li> <li>• Breathing techniques</li> <li>• Stress management techniques</li> </ul> <p>2.Hand-cooling group:</p> <ul style="list-style-type: none"> <li>• Thermal biofeedback training</li> <li>• Imagery (cold places)</li> <li>• Peripheral vasoconstriction</li> <li>• Therapist support</li> </ul> <p>3. Wait list control group</p> | 4 hours (hand-warming and hand-cooling groups) | Manualised: Yes<br>Treatment Fidelity independently rated: No<br>Treatment Fidelity monitored through supervision : NR | Yes               | <p>No significant between or within groups differences reported at any time point on</p> <ul style="list-style-type: none"> <li>• Depression scores</li> <li>• Anxiety scores</li> </ul> | <p>Significantly greater reduction in the hand-warming group than the hand-cooling and waitlist control groups from pre- to post-treatment in</p> <ul style="list-style-type: none"> <li>• Headache index</li> </ul> <p>No between group differences at 3,6 or 12 month follow-up</p> |
| Schurman et al (2010) | 1.BART:                                                                                                                                                                                                                                                                                                                                                                                                                                                                                                                        | 8 hours and 20 minutes                         | Manualised: Yes<br>Treatment Fidelity                                                                                  | Homework, focused | Significantly greater reduction in                                                                                                                                                       | Significantly greater reduction in the BART+SMC group                                                                                                                                                                                                                                 |

|                                  |                                                                                                                                                                                                                                                                                                                                                                                                                         |                     |                                                                                  |                                 |                                                                                                                                                                                                                                              |                                                                                                                                                                                 |
|----------------------------------|-------------------------------------------------------------------------------------------------------------------------------------------------------------------------------------------------------------------------------------------------------------------------------------------------------------------------------------------------------------------------------------------------------------------------|---------------------|----------------------------------------------------------------------------------|---------------------------------|----------------------------------------------------------------------------------------------------------------------------------------------------------------------------------------------------------------------------------------------|---------------------------------------------------------------------------------------------------------------------------------------------------------------------------------|
|                                  | <ul style="list-style-type: none"> <li>• standard medical treatment plus</li> <li>• relaxation methods such as abdominal breathing progressive muscle relaxation imagery and autogenic handwarming</li> <li>• integration and maintenance of these skills.</li> <li>• Participants were provided with a practice CD and a temperature trainer for use at home</li> </ul> <p>2.SMT: Standard medical treatment alone</p> |                     | independently rated: NR<br>Treatment Fidelity monitored through supervision : NR | on mastery of relaxation skills | <ul style="list-style-type: none"> <li>• parent report depressive scores for the SMC group than the BART+SMC group from pre-treatment to 6 month follow-up.</li> </ul> <p>No significant reduction in in either group for anxiety scores</p> | <p>compared with the SMC group from pre-treatment to 6 month follow in</p> <ul style="list-style-type: none"> <li>• highest level of pain intensity pain duration up</li> </ul> |
| Trautmann & Kroner-Herwig (2010) | <p>1.Internet based CBT:</p> <ul style="list-style-type: none"> <li>• education on headaches</li> <li>• stress management</li> </ul>                                                                                                                                                                                                                                                                                    | Unknown (6 modules) | Manualised: Yes<br>Treatment Fidelity independently                              | Yes                             | <p>No significant between group differences in</p> <ul style="list-style-type: none"> <li>• pain catastrophizing</li> </ul>                                                                                                                  | <p>No significant between group differences in</p> <ul style="list-style-type: none"> <li>• headache frequency</li> </ul>                                                       |

|                                                     |                                                                                                                                                                                                                                                                                                                                                                                                                                     |                    |                                                                                                                                  |              |                                                                                                                                                                                                                                                                                                                                                                                                                                                                 |                                                                                                                                                                                                                                                                                                                                      |
|-----------------------------------------------------|-------------------------------------------------------------------------------------------------------------------------------------------------------------------------------------------------------------------------------------------------------------------------------------------------------------------------------------------------------------------------------------------------------------------------------------|--------------------|----------------------------------------------------------------------------------------------------------------------------------|--------------|-----------------------------------------------------------------------------------------------------------------------------------------------------------------------------------------------------------------------------------------------------------------------------------------------------------------------------------------------------------------------------------------------------------------------------------------------------------------|--------------------------------------------------------------------------------------------------------------------------------------------------------------------------------------------------------------------------------------------------------------------------------------------------------------------------------------|
|                                                     | <ul style="list-style-type: none"> <li>• progressive relaxation techniques</li> <li>• cognitive restructuring</li> <li>• self-confidence strategies</li> <li>• problem-solving</li> </ul> <p>2.Applied Relaxation (AR):</p> <ul style="list-style-type: none"> <li>• progressive relaxation</li> <li>• cue-controlled relaxation</li> <li>• differential relaxation</li> </ul> <p>3.Education (control):<br/>headache education</p> |                    | rated: NA (online modules)                                                                                                       |              | <p>(measure of anxiety)</p> <p>Significant reduction in all three groups from pre-treatment to follow-up (time-points at post-treatment and 6 months) in</p> <ul style="list-style-type: none"> <li>• pain catastrophizing</li> </ul> <p>No significant within or between group differences in</p> <ul style="list-style-type: none"> <li>• depression</li> <li>• emotional adjustment</li> <li>• behavioural adjustment</li> </ul> <p>relationship factors</p> | <ul style="list-style-type: none"> <li>• headache intensity</li> <li>• headache duration</li> </ul> <p>Significant reduction in all three groups from pre-treatment to follow-up (time-points at post-treatment and 6 months) in</p> <ul style="list-style-type: none"> <li>• headache frequency</li> </ul> <p>headache duration</p> |
| van der Veek, Derkx, Benninga, Boer, de Haan (2013) | <p>1.CBT:<br/>Tailored to child's needs</p> <ul style="list-style-type: none"> <li>• relaxation exercises</li> <li>• cognitive re-structuring</li> <li>• graded exposure</li> <li>• behaviour therapy directed at parent</li> </ul>                                                                                                                                                                                                 | 4 hours 30 minutes | Manualised: No Tailored to child needs, including the therapists choice of 1 standard and 3 optional modules. Treatment Fidelity | Not reported | <p>Significantly greater reduction in the CBT group compared with the IMC group from pre- to post-intervention and at 6 month follow-up in</p> <ul style="list-style-type: none"> <li>• depression scores</li> <li>• anxiety scores.</li> </ul>                                                                                                                                                                                                                 | <p>No significant between group differences on</p> <ul style="list-style-type: none"> <li>• Pain intensity</li> <li>• pain duration</li> <li>• functional disability</li> <li>• Somatisation</li> </ul>                                                                                                                              |

|                       |                                                                                                                                                                                                                                                                                              |                         |                                                                                                                                       |    |                                                                                                                                                                                                                                                                  |                                                                                                                                                                                                                                                                                                                          |
|-----------------------|----------------------------------------------------------------------------------------------------------------------------------------------------------------------------------------------------------------------------------------------------------------------------------------------|-------------------------|---------------------------------------------------------------------------------------------------------------------------------------|----|------------------------------------------------------------------------------------------------------------------------------------------------------------------------------------------------------------------------------------------------------------------|--------------------------------------------------------------------------------------------------------------------------------------------------------------------------------------------------------------------------------------------------------------------------------------------------------------------------|
|                       | <p>(response to illness behaviours)</p> <p>2.Intensive Medical Treatment (IMT)</p> <ul style="list-style-type: none"> <li>• prescription of medication</li> <li>• education about complaints</li> <li>• advice about continuing school and daily activities</li> </ul> <p>dietary advice</p> |                         | <p>independently rated: NA</p> <p>Treatment Fidelity monitored through supervision : Yes</p>                                          |    | <p>These differences did not reach significance at 12 month follow-up as the IMC group scores had improved.</p>                                                                                                                                                  | <p>Significant within groups reduction from pre- to post-treatment for both groups in</p> <ul style="list-style-type: none"> <li>• Pain intensity</li> <li>• pain duration</li> <li>• functional disability</li> <li>• Somatisation</li> </ul> <p>These treatment gains were maintained at 6 and 12 month follow-up.</p> |
| Warner et al., (2011) | <p>1.CBT (Treatment of Anxiety and Physical Symptoms; TAPS)</p> <ul style="list-style-type: none"> <li>• relaxation</li> <li>• cognitive restructuring</li> <li>• exposure exercises to target fears related to physical pain and anxiety</li> </ul>                                         | 14 hours and 15 minutes | <p>Manualised: Yes</p> <p>Treatment Fidelity independently rated: NR</p> <p>Treatment Fidelity monitored through supervision : NR</p> | NR | <p>Significantly greater reductions in TAPS group compared with control group from pre- to post-treatment in</p> <ul style="list-style-type: none"> <li>• those meeting criteria for Anxiety Disorders</li> <li>• clinical severity rating of anxiety</li> </ul> | <p>Significantly greater reductions in TAPS compared with waitlist control group from pre- to post-treatment in</p> <ul style="list-style-type: none"> <li>• parent pain rating</li> <li>• child pain rating</li> </ul> <p>Significantly greater increases in TAPS</p>                                                   |



|                        |                                                                                                                                                                                                                                                                                                                                                                       |          |                                                                                                                              |     |                                                                                                                                                                                                                                                                                                                                                                          |                                                                                                                                                                                                                                                                                                                                                      |
|------------------------|-----------------------------------------------------------------------------------------------------------------------------------------------------------------------------------------------------------------------------------------------------------------------------------------------------------------------------------------------------------------------|----------|------------------------------------------------------------------------------------------------------------------------------|-----|--------------------------------------------------------------------------------------------------------------------------------------------------------------------------------------------------------------------------------------------------------------------------------------------------------------------------------------------------------------------------|------------------------------------------------------------------------------------------------------------------------------------------------------------------------------------------------------------------------------------------------------------------------------------------------------------------------------------------------------|
|                        | inducing situations <ul style="list-style-type: none"> <li>• change parental responses to illness (decrease avoidance related to pain and reinforce active coping)</li> </ul> 2.Wait list control group                                                                                                                                                               |          |                                                                                                                              |     | *Treatment gains were maintained at 3 month follow-up                                                                                                                                                                                                                                                                                                                    | compared with control group from pre- to post-treatment in <ul style="list-style-type: none"> <li>• independent evaluator global functioning scores</li> </ul> *Treatment gains were maintained at 3 month follow-up                                                                                                                                 |
| Wicksell et al. (2009) | 1.ACT/CBT Child: <ul style="list-style-type: none"> <li>• exposure to avoided situations</li> <li>• coping: emphasis of acceptance as an alternative to avoidance</li> <li>• cognitive shift in perspective from symptom reduction to valued living</li> <li>• behavioural activation</li> </ul> Parent: <ul style="list-style-type: none"> <li>• exposure</li> </ul> | 13 hours | Manualised: Yes<br>Treatment Fidelity independently monitored: Yes<br>Treatment Fidelity monitored through supervision : Yes | Yes | Significantly greater changes were seen in the ACT group as compared to the MDT group from pre- to post-treatment in <ul style="list-style-type: none"> <li>• Kinesiophobia (pain related anxiety)</li> <li>• pain impairment beliefs</li> </ul> This difference reached significance only for pain impairment beliefs when 3.5 and 6.5 month follow-up assessments were | Significantly greater changes were seen in the ACT group as compared to the MDT group from pre- to post-intervention in <ul style="list-style-type: none"> <li>• health-related quality of life</li> <li>• pain interference</li> <li>• pain intensity</li> <li>• pain-related discomfort</li> </ul> These differences reached significance only for |

|  |                                                                                                                                                                                                                                                                                                                                                                                                                                                                                                    |  |  |  |                                                                                                                                                                                                                                                     |                                                                                                                               |
|--|----------------------------------------------------------------------------------------------------------------------------------------------------------------------------------------------------------------------------------------------------------------------------------------------------------------------------------------------------------------------------------------------------------------------------------------------------------------------------------------------------|--|--|--|-----------------------------------------------------------------------------------------------------------------------------------------------------------------------------------------------------------------------------------------------------|-------------------------------------------------------------------------------------------------------------------------------|
|  | <ul style="list-style-type: none"> <li>• operant mechanisms (adapting responses to illness)</li> <li>• shift perspective from symptom alleviation to valued life</li> </ul> <p>2.Multidisciplinary treatment and amitriptyline (MDT)</p> <ul style="list-style-type: none"> <li>• The MDT was performed by a psychiatrist, a child psychologist, a physiotherapist and a pain physician</li> </ul> <p>Participants were seen by the different health care providers based on individual needs.</p> |  |  |  | <p>included in the analysis.</p> <p>A non-significant greater reduction in the ACT group compared to the MDT group in</p> <ul style="list-style-type: none"> <li>• in depression scores</li> </ul> <p>from pre-treatment to 6.5 month follow-up</p> | <p>Pain intensity and Pain-related discomfort when 3.5 and 6.5 month follow-up assessments were included in the analysis.</p> |
|--|----------------------------------------------------------------------------------------------------------------------------------------------------------------------------------------------------------------------------------------------------------------------------------------------------------------------------------------------------------------------------------------------------------------------------------------------------------------------------------------------------|--|--|--|-----------------------------------------------------------------------------------------------------------------------------------------------------------------------------------------------------------------------------------------------------|-------------------------------------------------------------------------------------------------------------------------------|

NR=Not Reported

\*referring to pre-post treatment gains as follow-up comparison not carried out since control group had been given treatment at this stage

\*\* Findings due to baseline differences and were not clinically significant.

\*\*\*significant at the .10 level

\*\*\*\* Effects disappeared when analysis controlled for baseline levels
